# Supplementary material
Source: publisher figshare collection journal article supplement (https://rs.figshare.com/ndownloader/files/13646453)
Supplement: Supplementary file [file 13646453]

## A-Amylase immobilization on amidoximated acrylic microfibers activated by cyanuric chloride

Yaaser Q. Almulaiky<sup>1,2</sup>, Faisal M. Aqlan<sup>3</sup>, Musab Aldhahri<sup>4,5</sup>, Mohammed Baeshen<sup>6</sup> Tariq Jamal Khan<sup>7</sup>, Khalid A. Khan<sup>8</sup>, Mohamed Afifi<sup>6,9</sup>, Ammar AL-Farga<sup>1</sup>, Mohiuddin Khan Warsi<sup>1</sup>, Mohammed Alkaled<sup>6</sup>, Aisha A.M. Alayafi<sup>6</sup>

<sup>1</sup>Department of Biochemistry, Faculty of Science, University of Jeddah, Jeddah, Saudi Arabia

<sup>2</sup>Chemistry Department, Faculty of Applied Science, Taiz University, Taiz, Yemen

<sup>3</sup>Chemistry Department, Faculty of Science, University of Jeddah, Jeddah, Saudi Arabia

<sup>4</sup>Department of Biochemistry, Faculty of Science, King Abdulaziz University, Jeddah, Saudi Arabia

<sup>5</sup>Center of Nanotechnology, King Abdulaziz University, Jeddah, Saudi Arabia

<sup>6</sup>Department of biology, Faculty of Science, University of Jeddah, Jeddah, Saudi Arabia

<sup>7</sup>Stem Cell P2 Laboratory, The Center for Reproductive Medicine, Shantou University Medical College, Shantou, 515041, People's Republic of China

<sup>8</sup>Chemistry Department, Faculty of Science, King Abdulaziz University, Jeddah, Saudi Arabia

<sup>9</sup>Biochemistry Department, Faculty of Veterinary Medicine, Zagazig University, Egypt

### Supplementary Table 4

Inhibitor effects on soluble and immobilized  $\alpha$ -amylase.

| Inhibitor 2mM     | Soluble<br>$\alpha$ -amylase | OD at 560<br>nm<br>n/3 | Immobilized<br>$\alpha$ -amylase | OD at 560<br>nm<br>n/3 |
|-------------------|------------------------------|------------------------|----------------------------------|------------------------|
|                   | Residual<br>activity %       |                        | Residual activity<br>%           |                        |
| EDTA              | 18                           | 0.219                  | 60                               | 0.438                  |
| Sodium Citrate    | 45                           | 0.548                  | 70                               | 0.511                  |
| Sodium Oxalate    | 59                           | 0.719                  | 76                               | 0.554                  |
| 1,10 phenatroline | 60                           | 0.731                  | 88                               | 0.642                  |
| DTNB              | 61                           | 0.745                  | 84                               | 0.613                  |
